# Supplementary material for: 16S rRNA, metagenomics and 2bRAD-M sequencing to decode human thanatomicrobiome
Source: PubMed Central journal article supplement (PMC11227556; doi:10.1038/s41597-024-03518-3), 2024-07-06
Supplement: 41597_2024_3518_MOESM1_ESM.pdf [file 41597_2024_3518_MOESM1_ESM.pdf]

# Content

|                 |   |
|-----------------|---|
| Figure S1 ..... | 1 |
|-----------------|---|

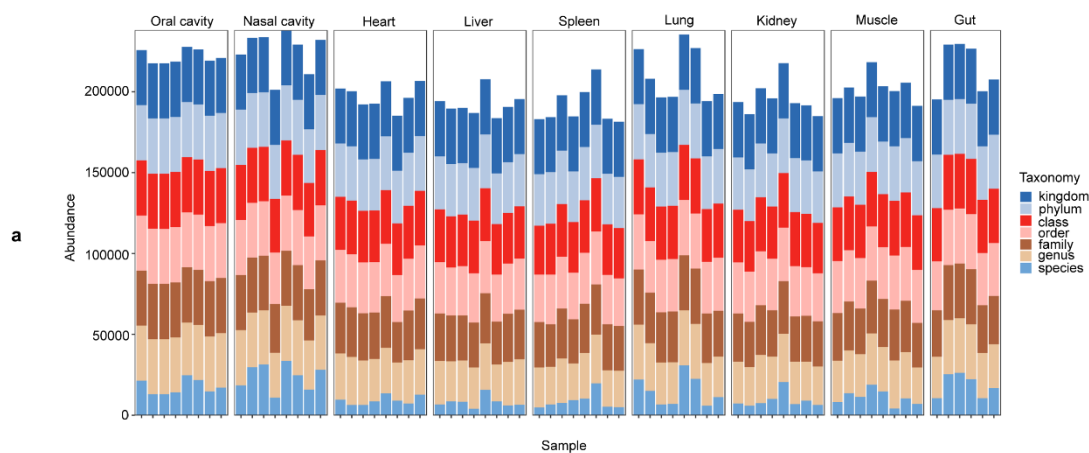

| Group       | Sample       | total_reads | dehost_reads | percent |       |
|-------------|--------------|-------------|--------------|---------|-------|
| Oral cavity | S1-1         | 99647138    | 72622950     | 72.88%  |       |
|             | S1-2         | 97994898    | 3660896      | 3.74%   |       |
|             | S1-4         | 92566508    | 4167752      | 4.50%   |       |
|             | S1-5         | 99789924    | 25433014     | 25.49%  |       |
|             | S1-6         | 102682496   | 57718922     | 56.21%  |       |
|             | S1-7         | 98444456    | 5864658      | 5.96%   |       |
|             | S1-8         | 88867898    | 18834106     | 21.19%  |       |
|             | Nasal cavity | S2-1        | 116955074    | 4561548 | 3.90% |
| S2-2        |              | 110867710   | 1341256      | 1.21%   |       |
| S2-3        |              | 121997012   | 1430232      | 1.17%   |       |
| S2-4        |              | 117581734   | 1252292      | 1.07%   |       |
| S2-5        |              | 94213012    | 2874278      | 3.05%   |       |
| S2-6        |              | 88148342    | 13530978     | 15.35%  |       |
| S2-7        |              | 98132472    | 859562       | 0.88%   |       |
| S2-8        |              | 100278326   | 1489620      | 1.49%   |       |
| Heart       | S3-1         | 110537566   | 1364854      | 1.23%   |       |
|             | S3-2         | 100903484   | 954992       | 0.95%   |       |
|             | S3-3         | 113869566   | 1181044      | 1.04%   |       |
|             | S3-4         | 104247544   | 1064510      | 1.02%   |       |
|             | S3-5         | 102546254   | 1430246      | 1.39%   |       |
|             | S3-6         | 96204304    | 1010626      | 1.05%   |       |
|             | S3-7         | 105811390   | 1054894      | 1.00%   |       |
|             | S3-8         | 97057904    | 1121400      | 1.16%   |       |
| Liver       | S4-1         | 104521946   | 1458954      | 1.40%   |       |
|             | S4-2         | 101265858   | 1291486      | 1.28%   |       |
|             | S4-4         | 98033328    | 1080804      | 1.10%   |       |
|             | S4-5         | 105272108   | 1398726      | 1.33%   |       |
|             | S4-6         | 98326630    | 1096526      | 1.12%   |       |
|             | S4-7         | 85025058    | 1082602      | 1.27%   |       |
|             | S4-8         | 85750660    | 978580       | 1.14%   |       |
|             | Spleen       | S5-1        | 88016314     | 942036  | 1.07% |
| S5-2        |              | 86833986    | 831524       | 0.96%   |       |
| S5-4        |              | 111448798   | 1024934      | 0.92%   |       |
| S5-5        |              | 94950502    | 964164       | 1.02%   |       |
| S5-6        |              | 104170766   | 1093146      | 1.05%   |       |
| S5-7        |              | 102628578   | 1149562      | 1.12%   |       |
| Lung        |              | S6-1        | 96780936     | 1298722 | 1.34% |
|             |              | S6-2        | 93130122     | 970516  | 1.04% |
|             | S6-4         | 105996248   | 1007464      | 0.95%   |       |
|             | S6-5         | 106754672   | 4549624      | 4.26%   |       |
|             | S6-6         | 104546798   | 2100914      | 2.01%   |       |
|             | S6-7         | 109468682   | 973044       | 0.89%   |       |
|             | S6-8         | 102344356   | 1003010      | 0.98%   |       |
|             | Kidney       | S7-1        | 99101090     | 1236920 | 1.25% |
| S7-5        |              | 99955200    | 1085512      | 1.09%   |       |
| S7-6        |              | 91880448    | 955064       | 1.04%   |       |
| S7-8        |              | 100603504   | 996358       | 0.99%   |       |
| Muscle      | S8-1         | 118287554   | 1270852      | 1.07%   |       |
|             | S8-2         | 161024352   | 1280836      | 0.80%   |       |
|             | S8-3         | 152560654   | 1112002      | 0.73%   |       |
|             | S8-4         | 148134302   | 1082198      | 0.73%   |       |
|             | S8-5         | 152797178   | 1296062      | 0.85%   |       |
|             | S8-6         | 137981250   | 1038098      | 0.75%   |       |
|             | S8-7         | 155095752   | 1089744      | 0.70%   |       |
|             | S8-8         | 143358850   | 1118246      | 0.78%   |       |
| Gut         | S9-4         | 144092690   | 1196408      | 0.83%   |       |
|             | S9-5         | 119443566   | 1072792      | 0.90%   |       |
|             | S9-6         | 108314896   | 1984338      | 1.83%   |       |
|             | S9-7         | 109922650   | 811866       | 0.74%   |       |

Figure S1 Comparative analysis of microbial diversity and sequencing efficacy across different samples using 16S RNA and metagenomic sequencing techniques. (a) Numbers of ASVs in each sample at different taxonomic levels of 16S RNA sequencing. (b) Statistics of metagenomic sequencing reads.
